# Supplementary material for: Genetic variation and DNA fingerprinting of durian types in Malaysia using simple sequence repeat (SSR) markers
Source: PubMed Central journal article supplement (PMC5836569; doi:10.7717/peerj.4266), 2018-03-02
Supplement: peerj-06-4266-s002.pdf [file peerj-06-4266-s002.pdf]

**Genetic variation and DNA fingerprinting of durian types in Malaysia using simple sequence repeat (SSR) markers**

Siew GY, Ng WL, Tan SW, Alitheen NB, Tan SG, Yeap SK

---

**Supplementary Data – DNA fingerprinting gel images**

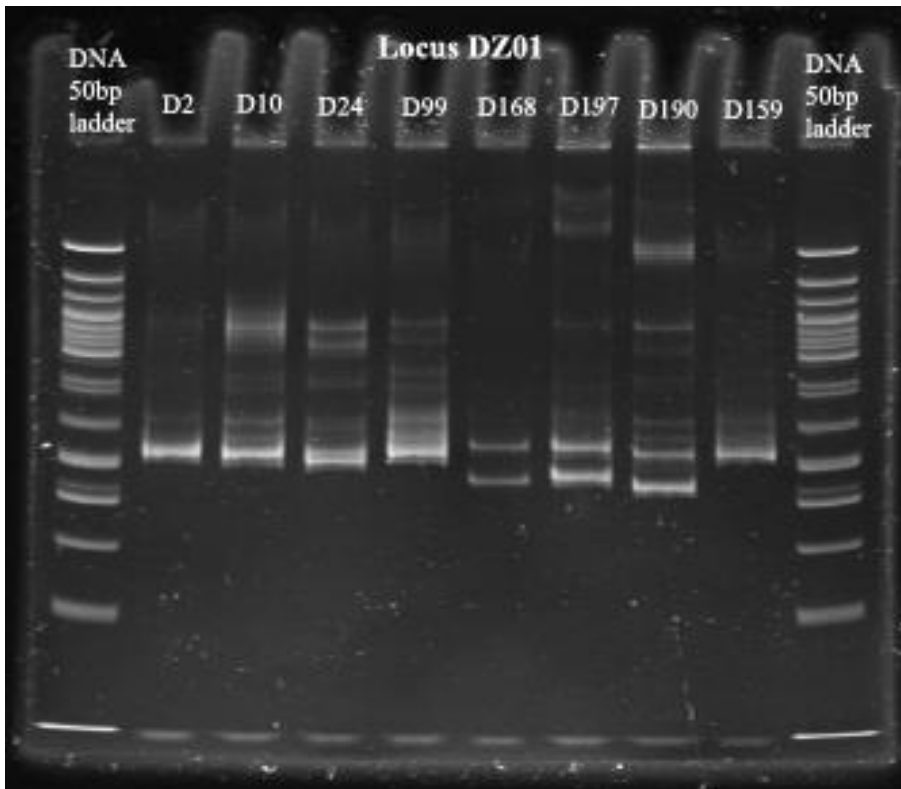

**Figure S1** PCR products of eight durian types at locus DZ01 on 8% (w/v) polyacrylamide gel

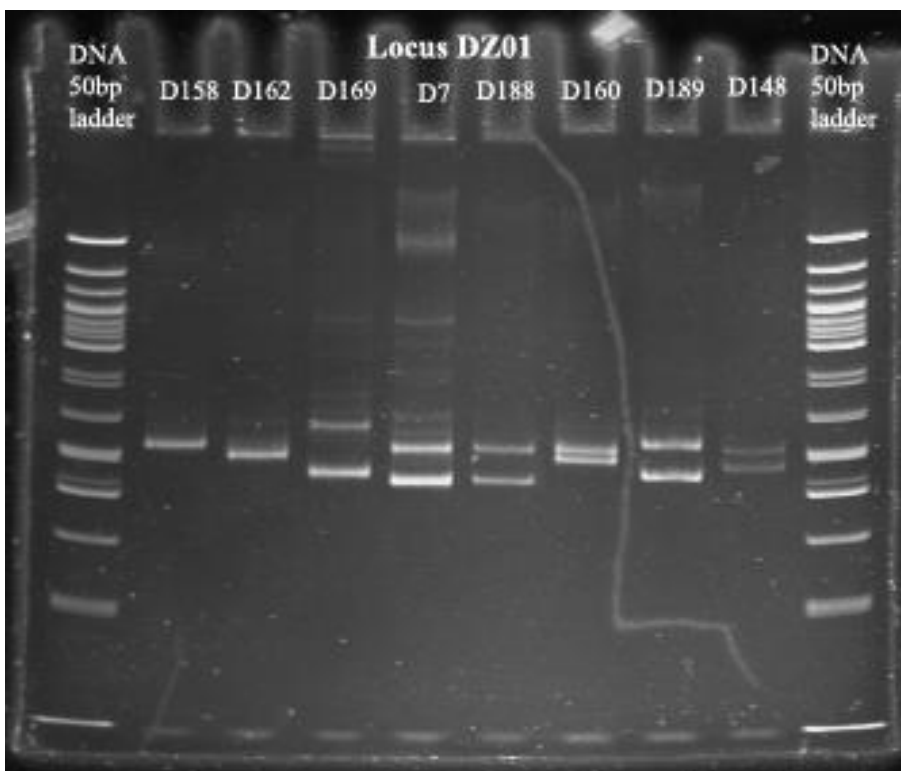

**Figure S2** PCR products of eight durian types at locus DZ01 on 8% (w/v) polyacrylamide gel

**Genetic variation and DNA fingerprinting of durian types in Malaysia using simple sequence repeat (SSR) markers**

Siew GY, Ng WL, Tan SW, Alitheen NB, Tan SG, Yeap SK

---

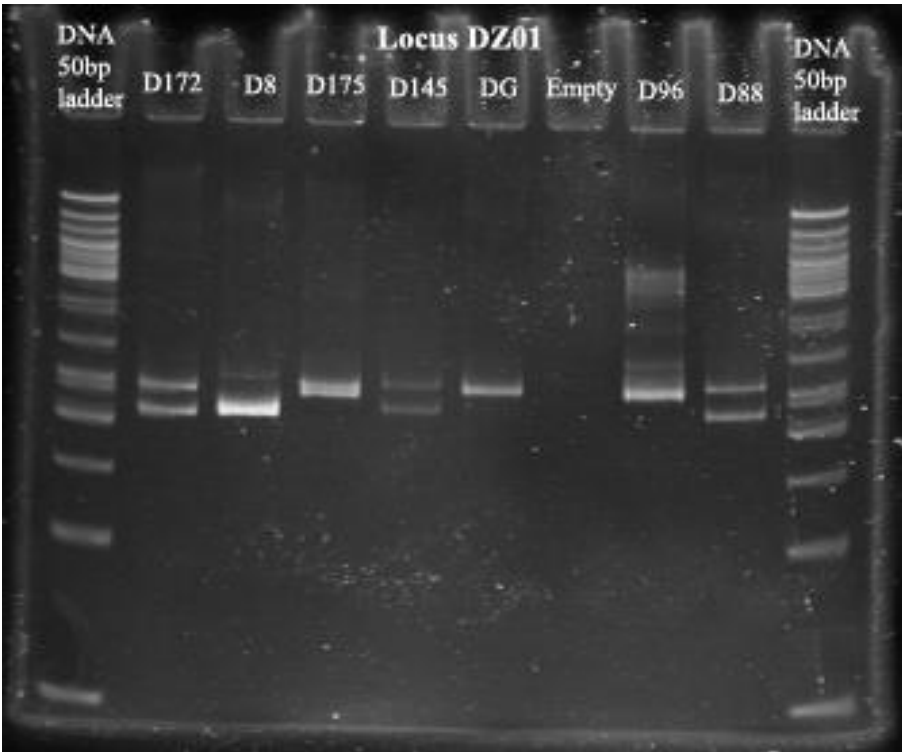

**Figure S3** PCR products of seven durian types at locus DZ01 on 8% (w/v) polyacrylamide gel

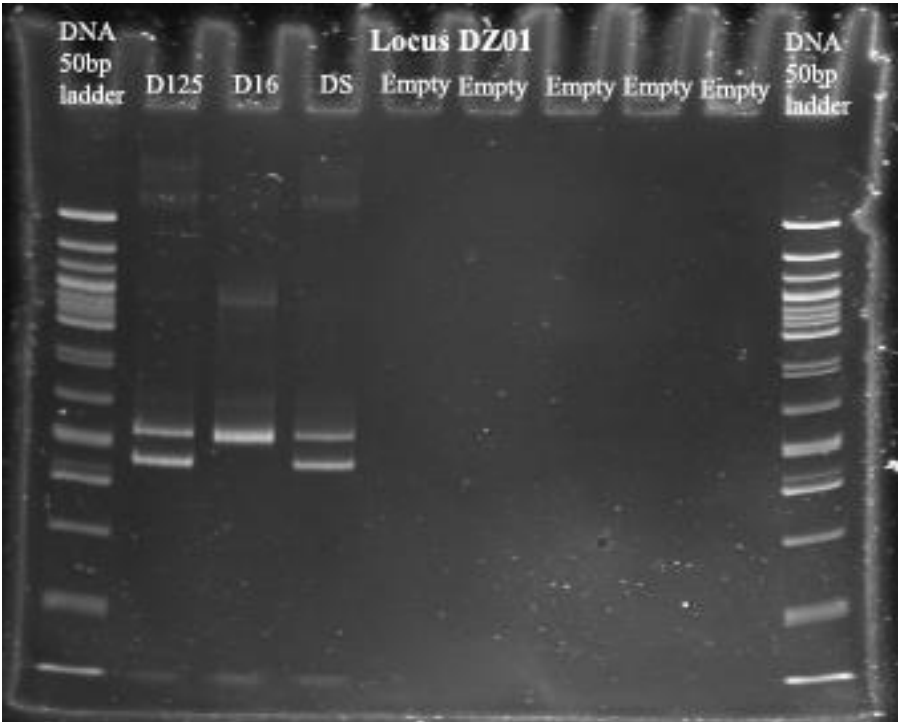

**Figure S4** PCR products of three durian types at locus DZ01 on 8% (w/v) polyacrylamide gel

**Genetic variation and DNA fingerprinting of durian types in Malaysia using simple sequence repeat (SSR) markers**

Siew GY, Ng WL, Tan SW, Alitheen NB, Tan SG, Yeap SK

---

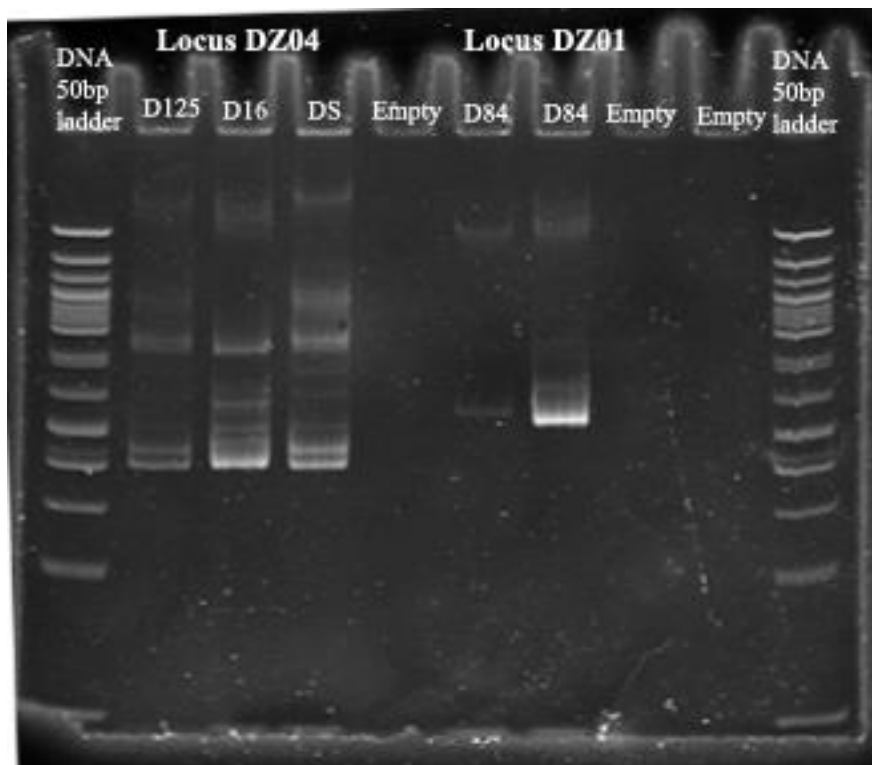

**Figure S5** PCR products of two durian types and three durian types at loci DZ01 and DZ04 respectively on 8% (w/v) polyacrylamide gel

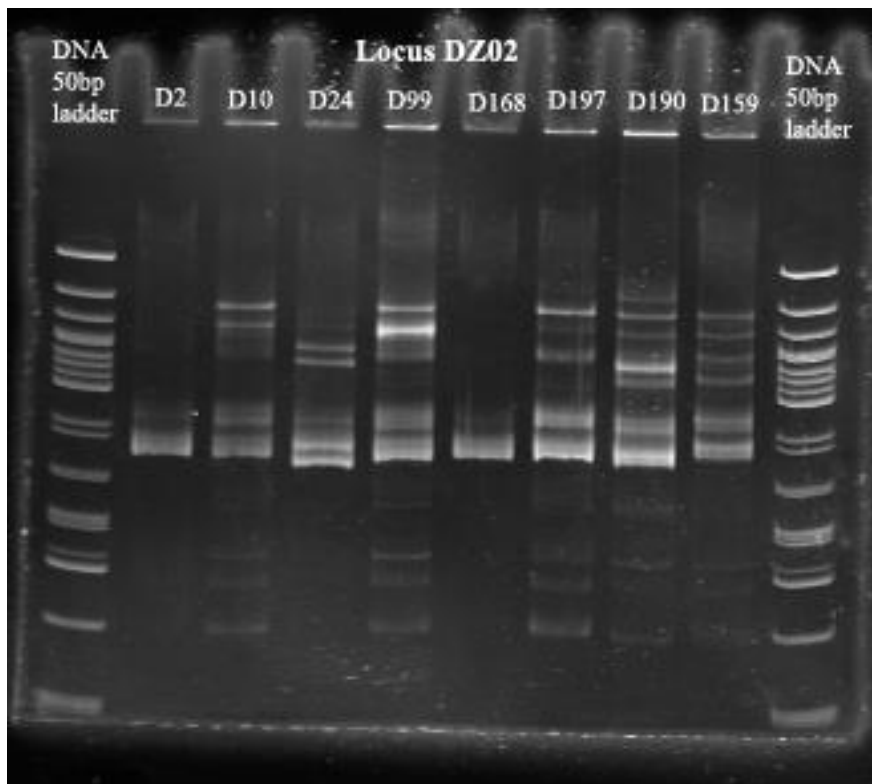

**Figure S6** PCR products of eight durian types at locus DZ02 on 8% (w/v) polyacrylamide gel

**Genetic variation and DNA fingerprinting of durian types in Malaysia using simple sequence repeat (SSR) markers**

Siew GY, Ng WL, Tan SW, Alitheen NB, Tan SG, Yeap SK

---

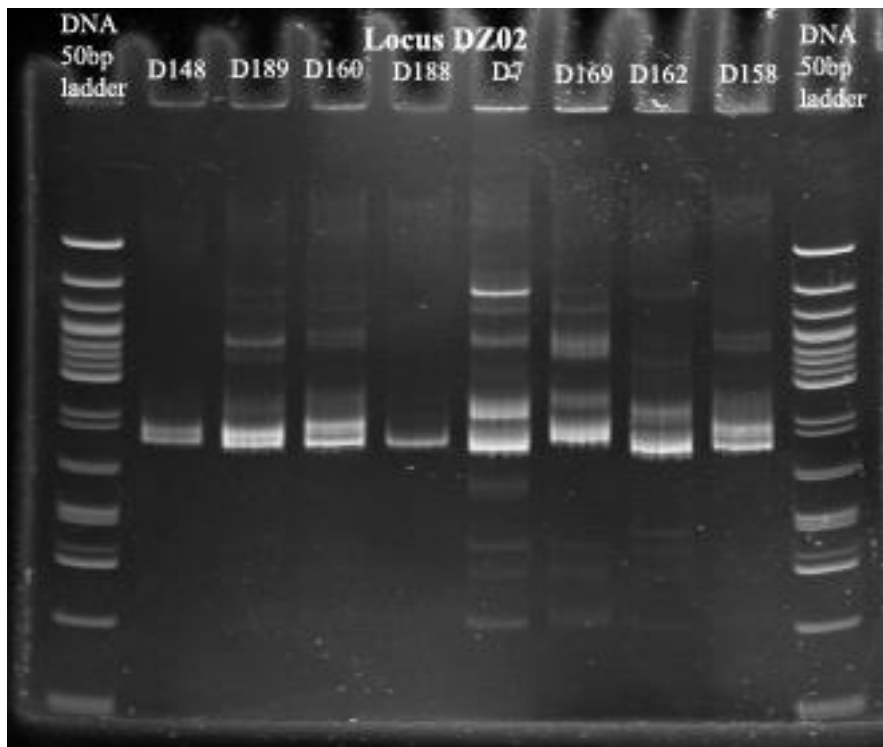

**Figure S7** PCR products of eight durian types at locus DZ02 on 8% (w/v) polyacrylamide gel

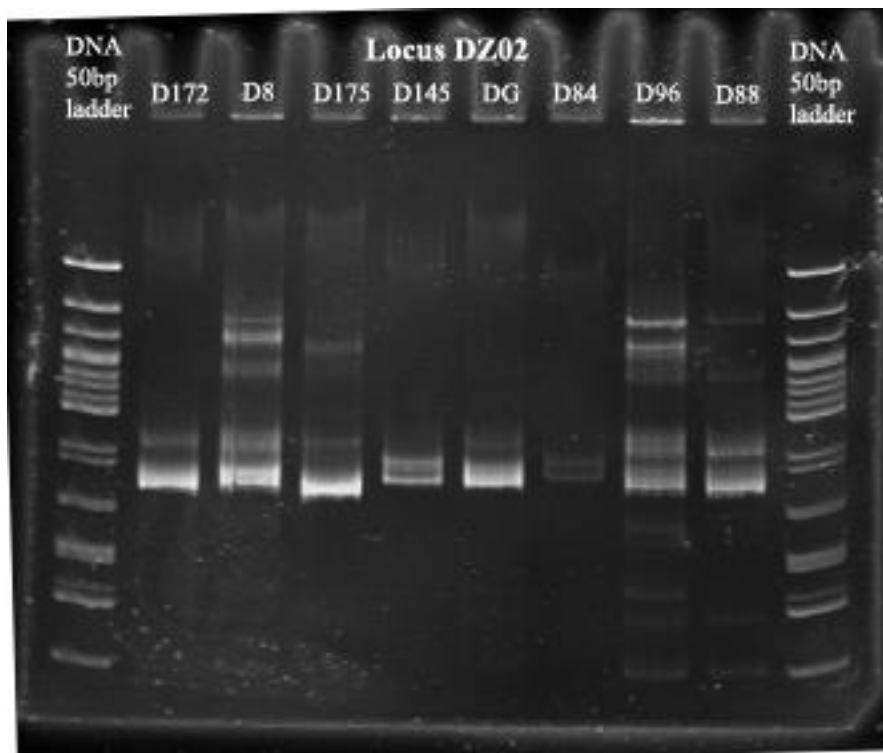

**Figure S8** PCR products of eight durian types at locus DZ02 on 8% (w/v) polyacrylamide gel

**Genetic variation and DNA fingerprinting of durian types in Malaysia using simple sequence repeat (SSR) markers**

Siew GY, Ng WL, Tan SW, Alitheen NB, Tan SG, Yeap SK

---

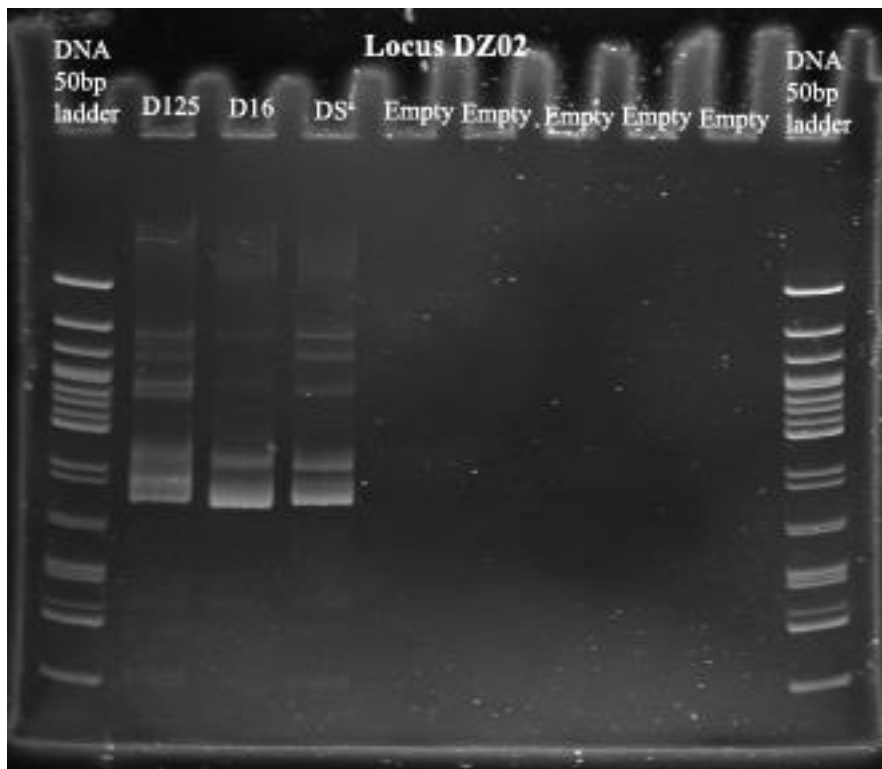

**Figure S9** PCR products of three durian types at locus DZ02 on 8% (w/v) polyacrylamide gel

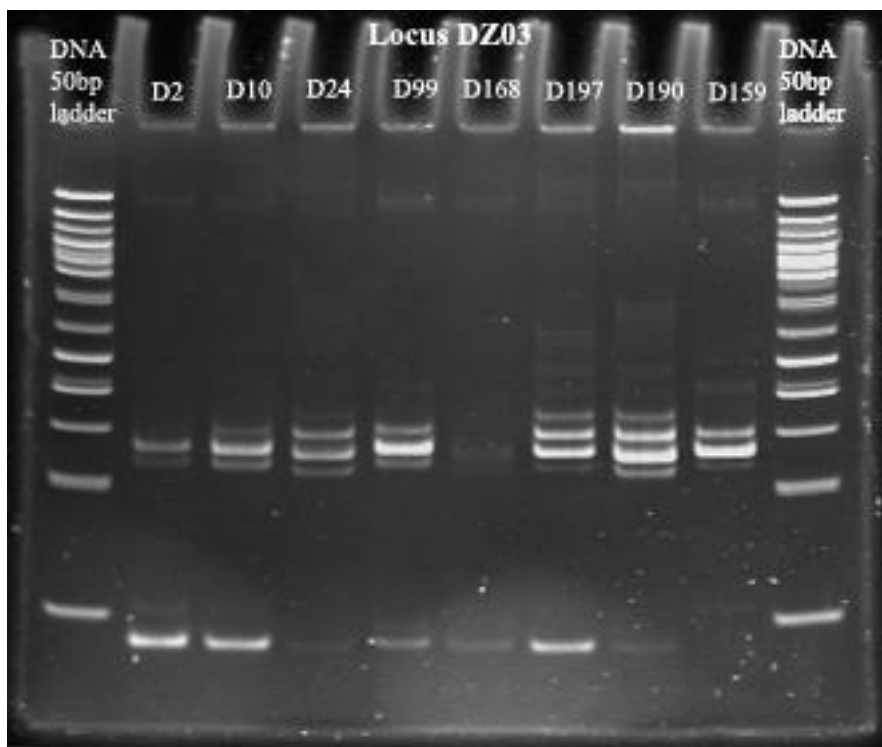

**Figure S10** PCR products of eight durian types at locus DZ03 on 8% (w/v) polyacrylamide gel

**Genetic variation and DNA fingerprinting of durian types in Malaysia using simple sequence repeat (SSR) markers**

Siew GY, Ng WL, Tan SW, Alitheen NB, Tan SG, Yeap SK

---

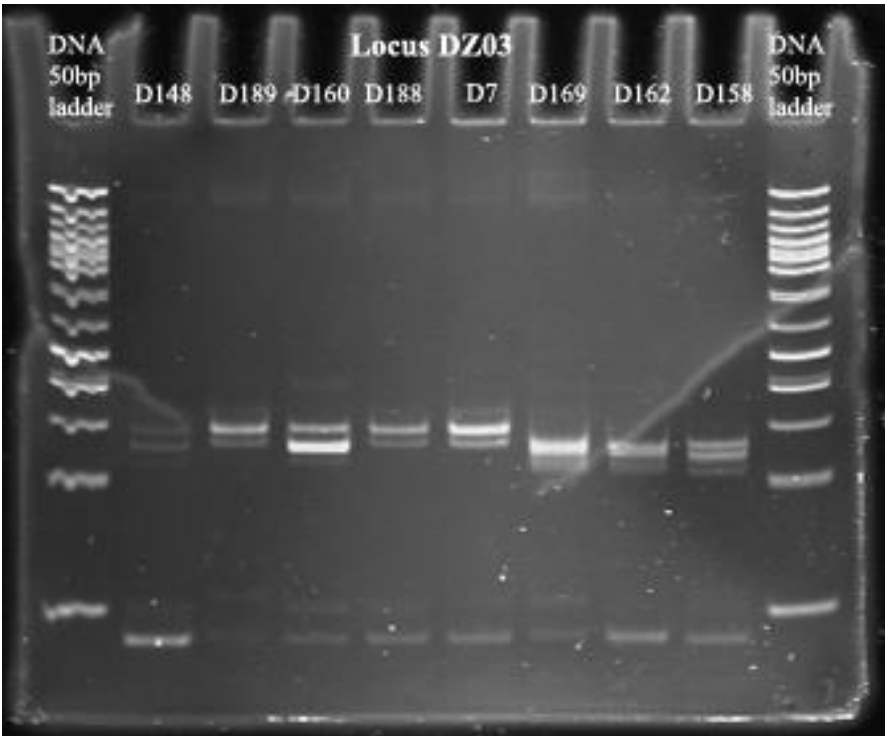

**Figure S11** PCR products of eight durian types at locus DZ03 on 8% (w/v) polyacrylamide gel

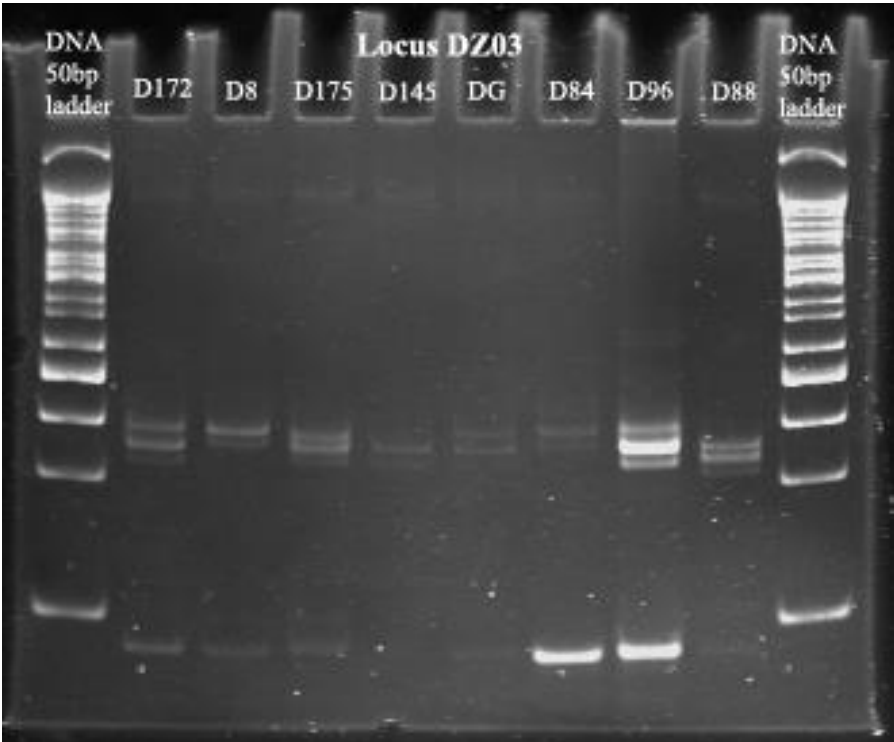

**Figure S12** PCR products of eight durian types at locus DZ03 on 8% (w/v) polyacrylamide gel

**Genetic variation and DNA fingerprinting of durian types in Malaysia using simple sequence repeat (SSR) markers**

Siew GY, Ng WL, Tan SW, Alitheen NB, Tan SG, Yeap SK

---

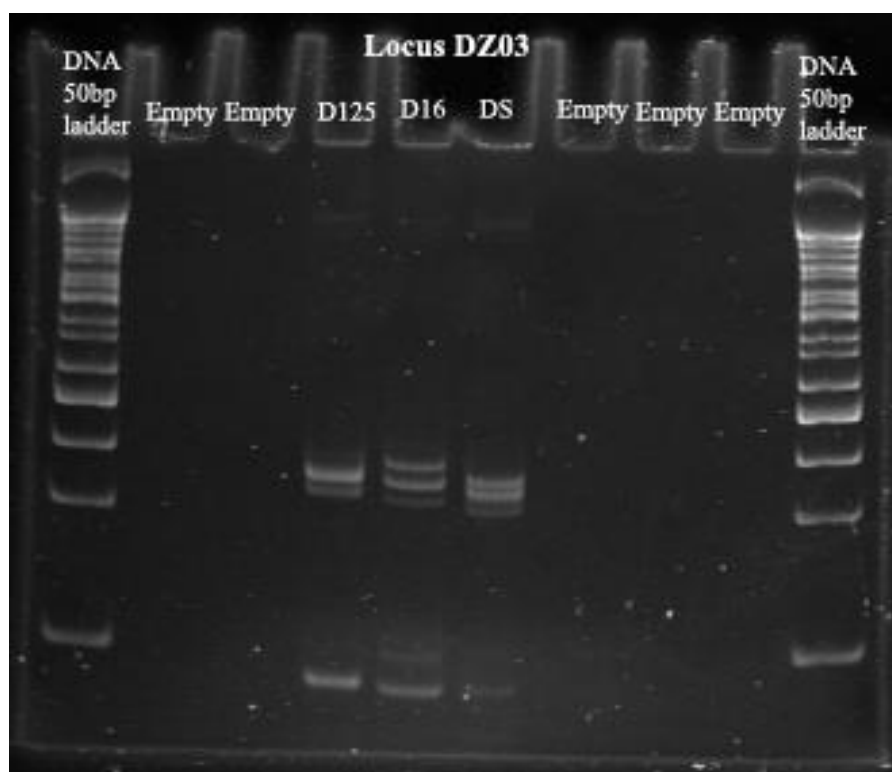

**Figure S13** PCR products of three durian types at locus DZ03 on 8% (w/v) polyacrylamide gel

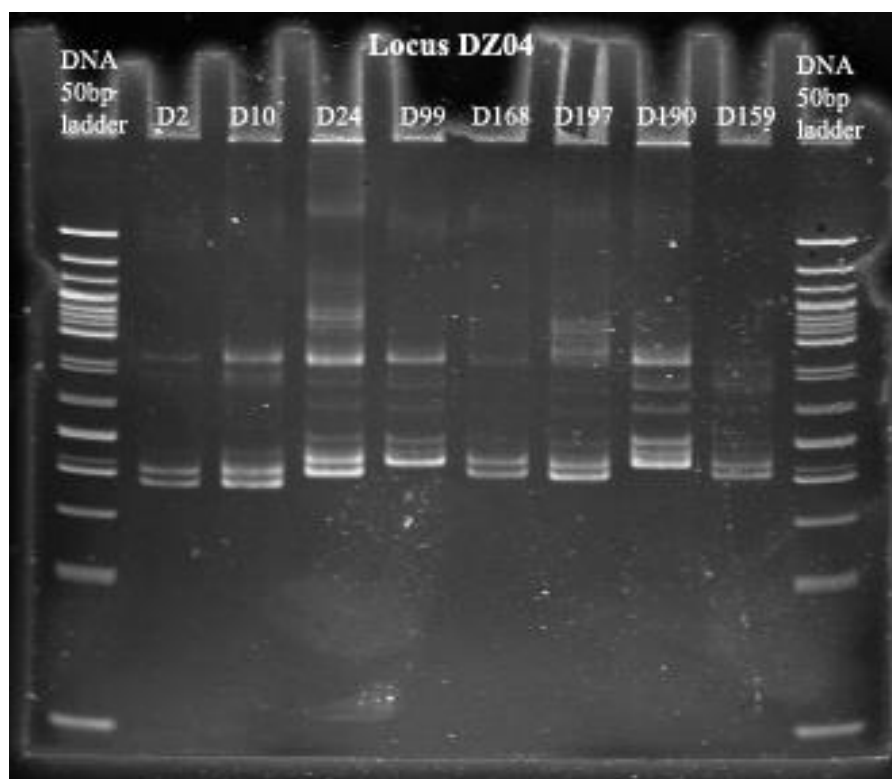

**Figure S14** PCR products of eight durian types at locus DZ04 on 8% (w/v) polyacrylamide gel

**Genetic variation and DNA fingerprinting of durian types in Malaysia using simple sequence repeat (SSR) markers**

Siew GY, Ng WL, Tan SW, Alitheen NB, Tan SG, Yeap SK

---

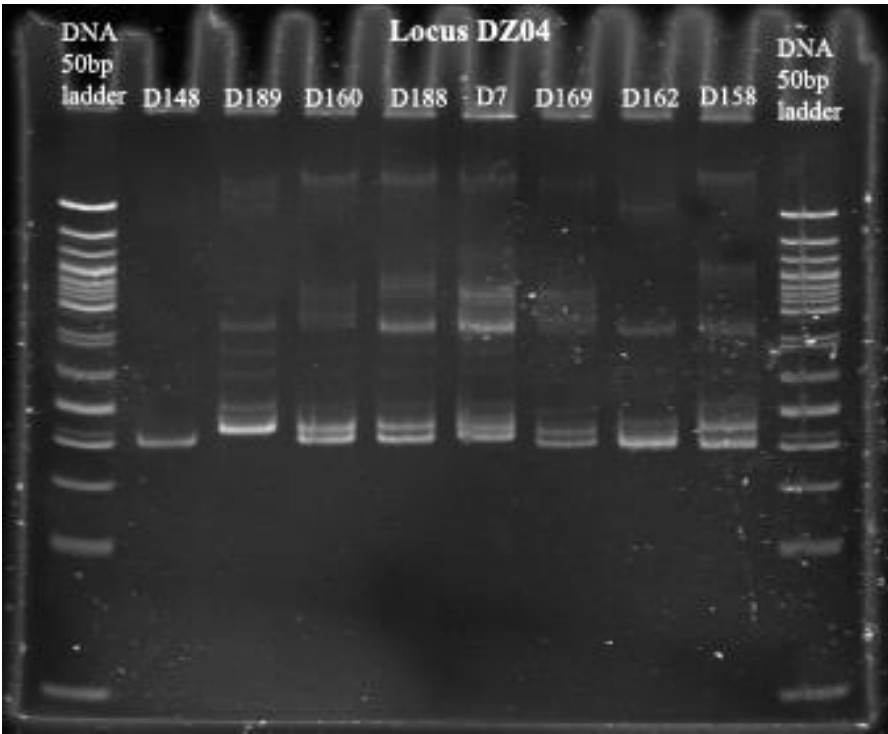

**Figure S15** PCR products of eight durian types at locus DZ04 on 8% (w/v) polyacrylamide gel

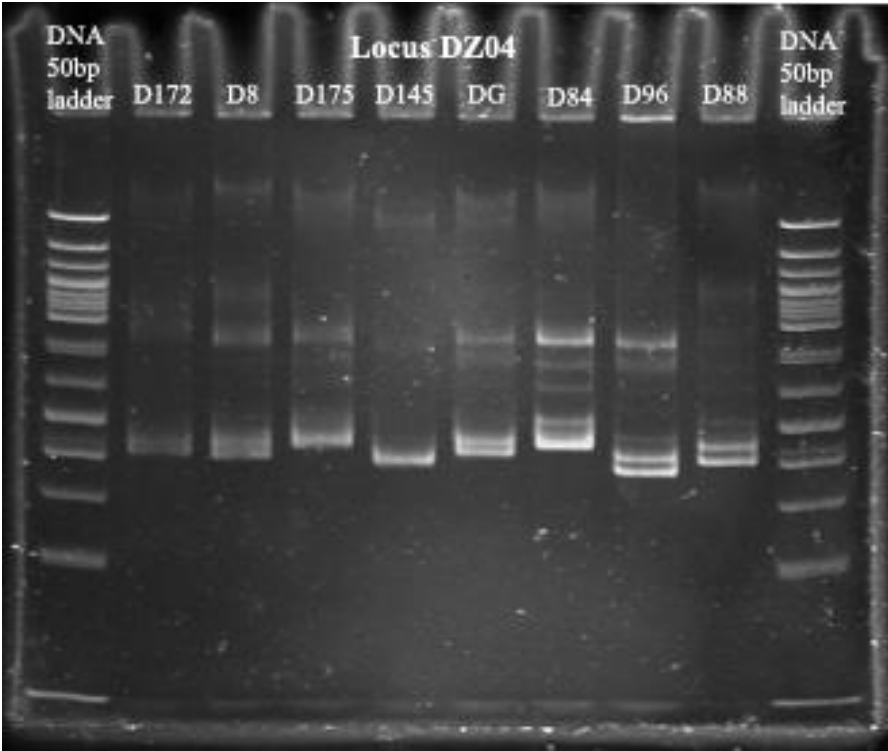

**Figure S16** PCR products of eight durian types at locus DZ04 on 8% (w/v) polyacrylamide gel



**Genetic variation and DNA fingerprinting of durian types in Malaysia using simple sequence repeat (SSR) markers**

Siew GY, Ng WL, Tan SW, Alitheen NB, Tan SG, Yeap SK

---

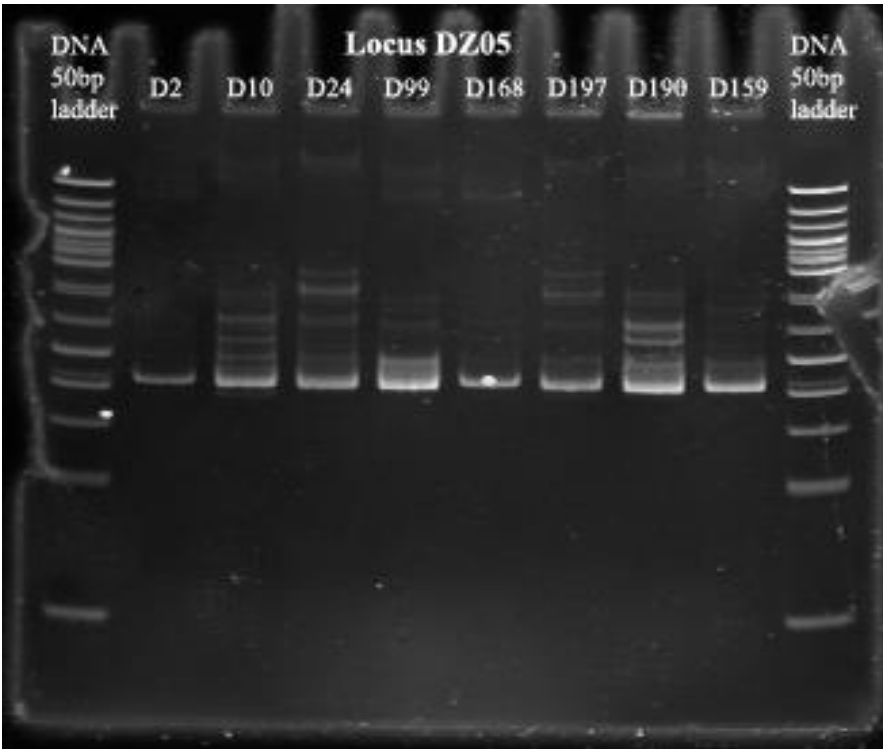

**Figure S17** PCR products of eight durian types at locus DZ05 on 8% (w/v) polyacrylamide gel

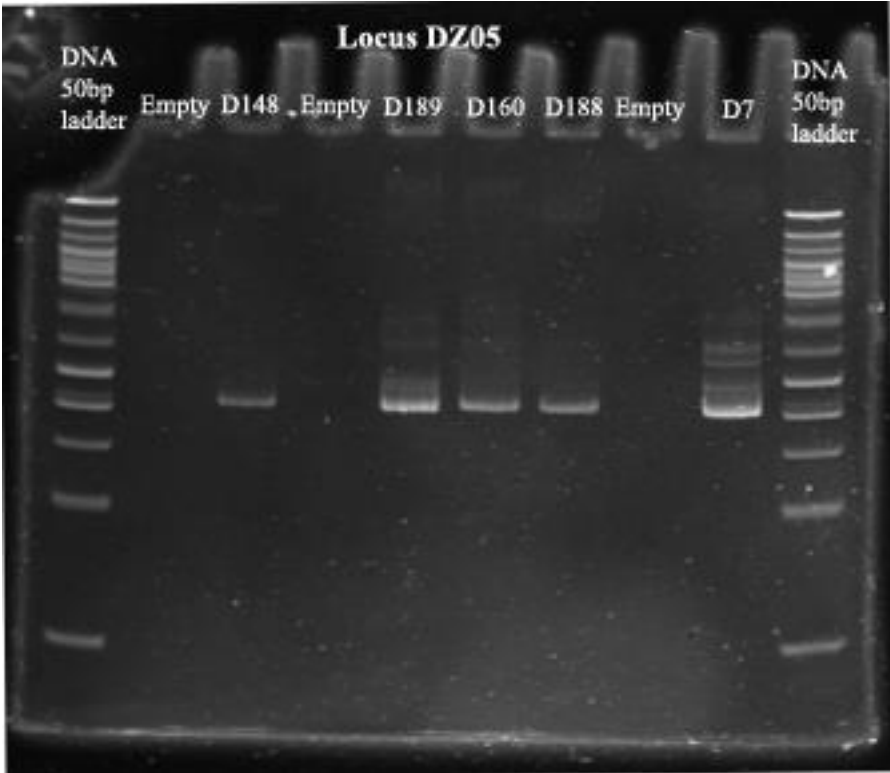

**Figure S18** PCR products of five durian types at locus DZ05 on 8% (w/v) polyacrylamide gel

**Genetic variation and DNA fingerprinting of durian types in Malaysia using simple sequence repeat (SSR) markers**

Siew GY, Ng WL, Tan SW, Alitheen NB, Tan SG, Yeap SK

---

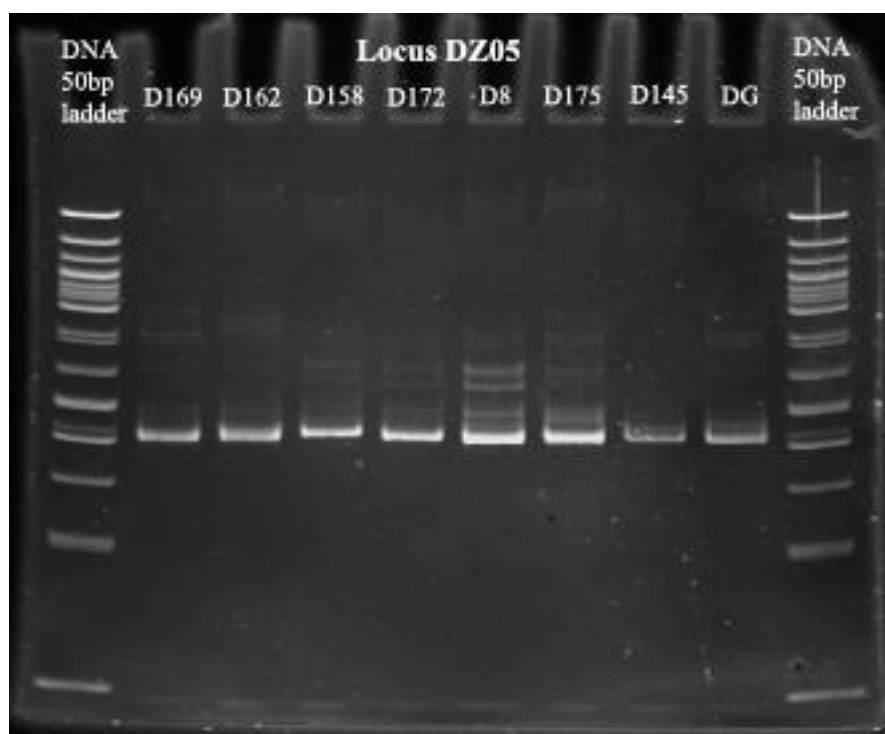

**Figure S19** PCR products of eight durian types at locus DZ05 on 8% (w/v) polyacrylamide gel

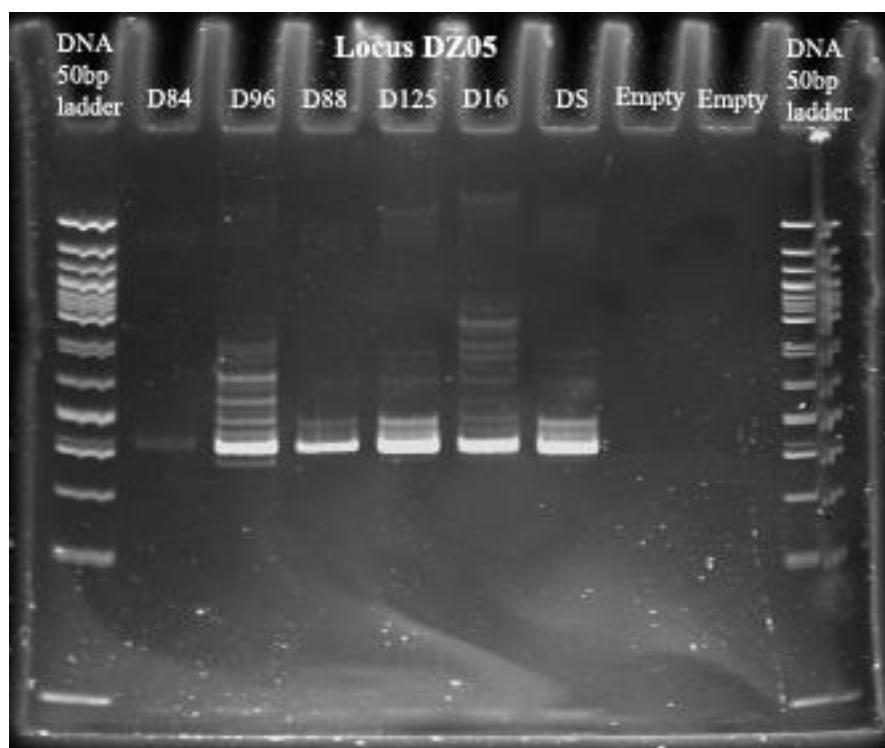

**Figure S20** PCR products of six durian types at locus DZ05 on 8% (w/v) polyacrylamide gel

**Genetic variation and DNA fingerprinting of durian types in Malaysia using simple sequence repeat (SSR) markers**

Siew GY, Ng WL, Tan SW, Alitheen NB, Tan SG, Yeap SK

---

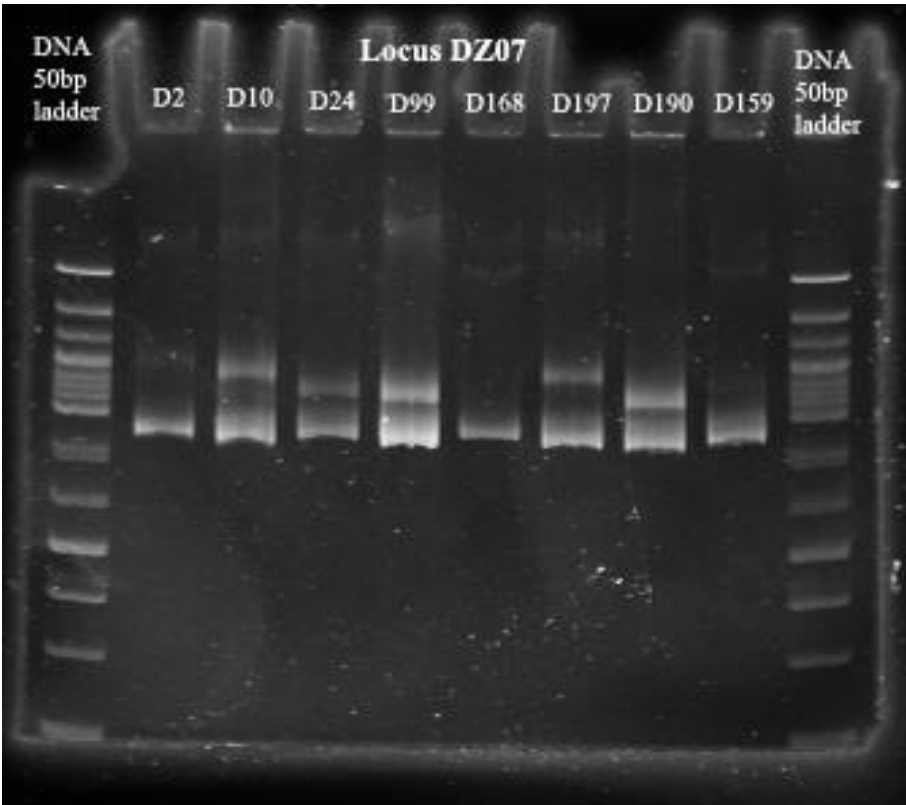

Figure S21 PCR products of eight durian types at locus DZ07 on 8% (w/v) polyacrylamide gel

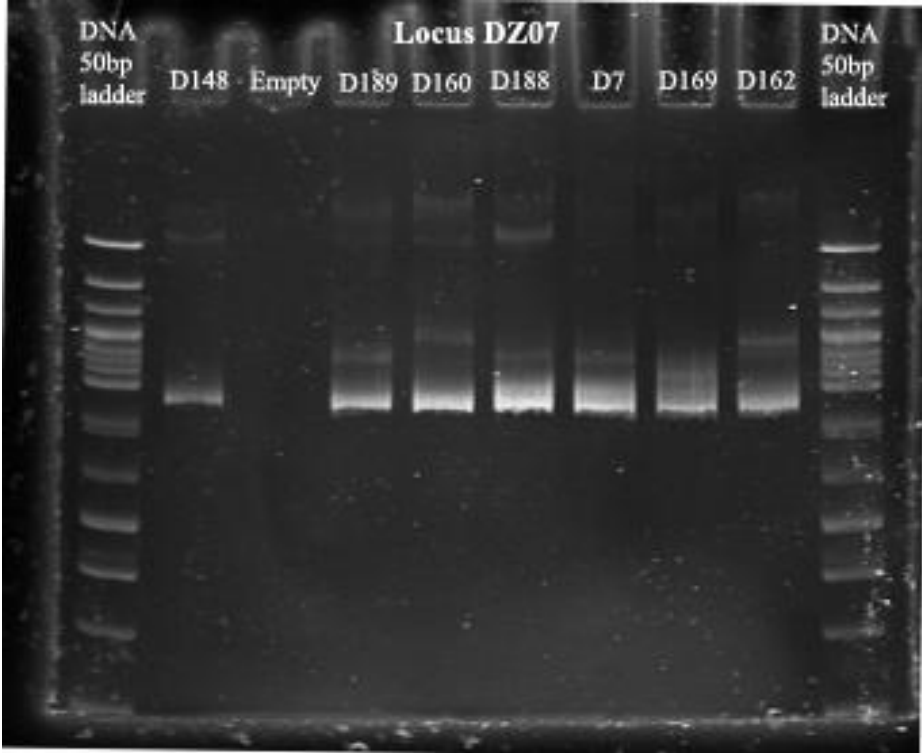

Figure S22 PCR products of seven durian types at locus DZ07 on 8% (w/v) polyacrylamide gel

**Genetic variation and DNA fingerprinting of durian types in Malaysia using simple sequence repeat (SSR) markers**

Siew GY, Ng WL, Tan SW, Alitheen NB, Tan SG, Yeap SK

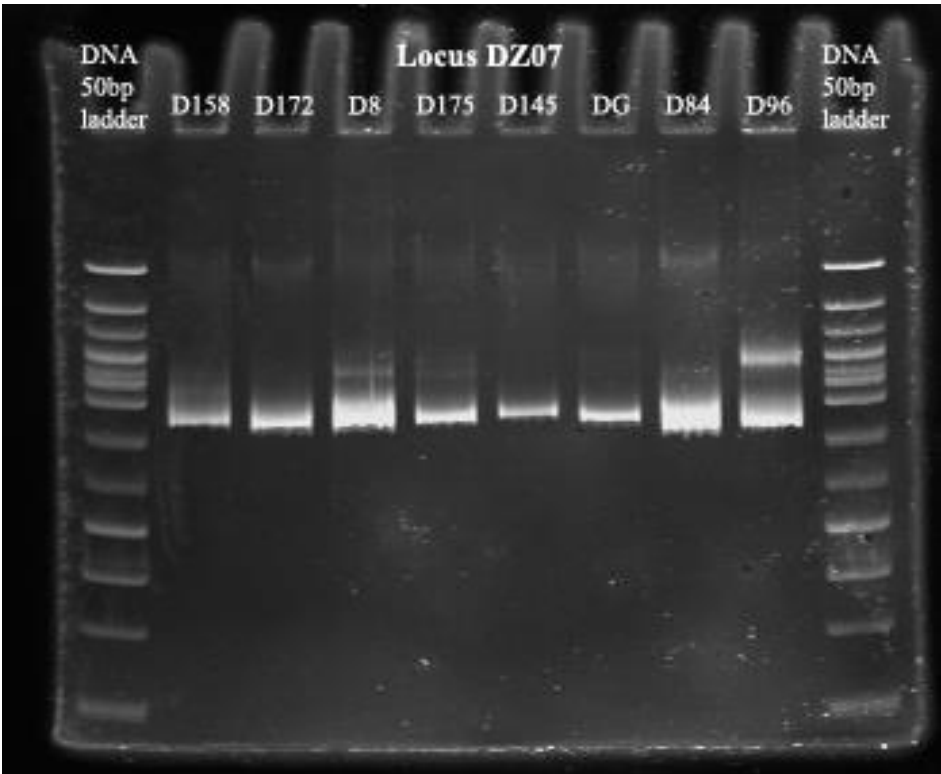

Figure S23 PCR products of eight durian types at locus DZ07 on 8% (w/v) polyacrylamide gel

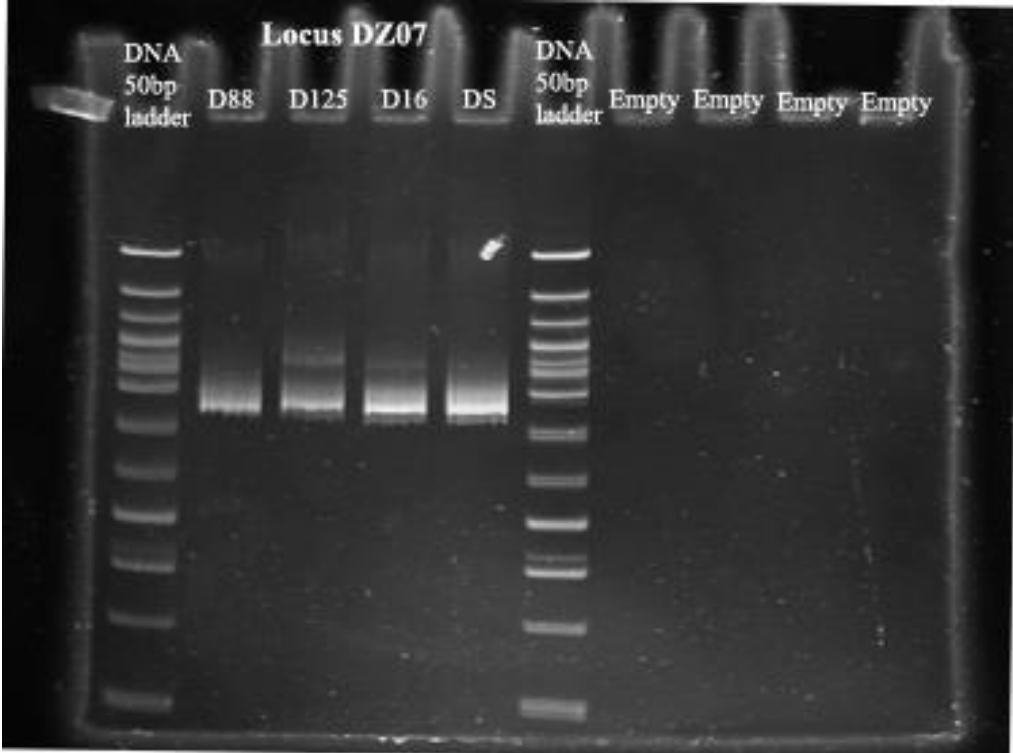

Figure S24 PCR products of four durian types at locus DZ07 on 8% (w/v) polyacrylamide gel

**Genetic variation and DNA fingerprinting of durian types in Malaysia using simple sequence repeat (SSR) markers**

Siew GY, Ng WL, Tan SW, Alitheen NB, Tan SG, Yeap SK

---

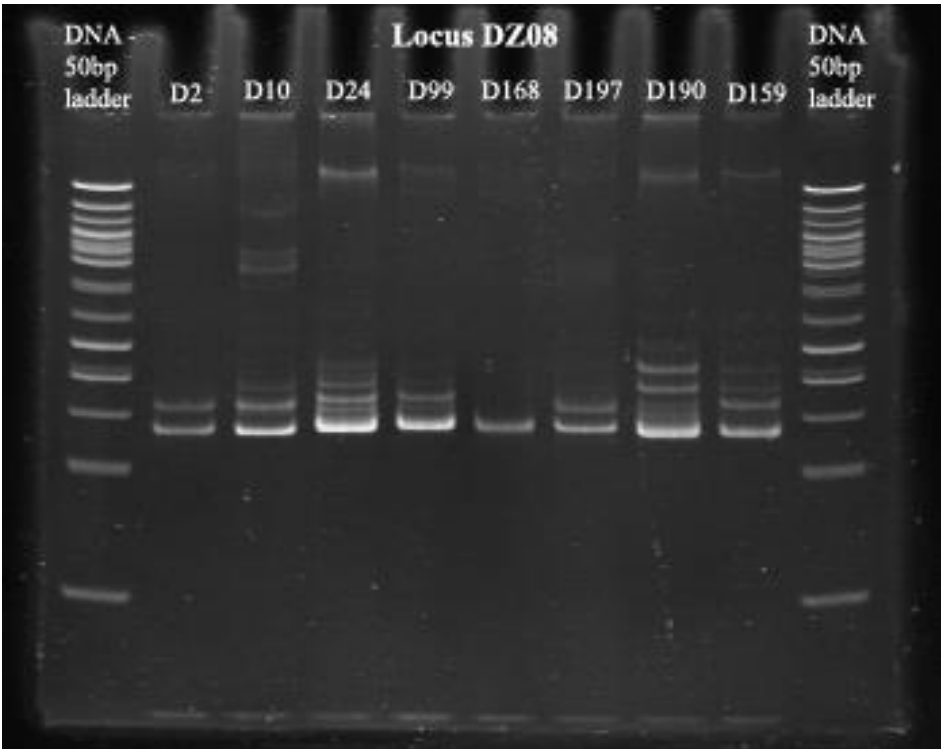

Figure S25 PCR products of eight durian types at locus DZ08 on 8% (w/v) polyacrylamide gel

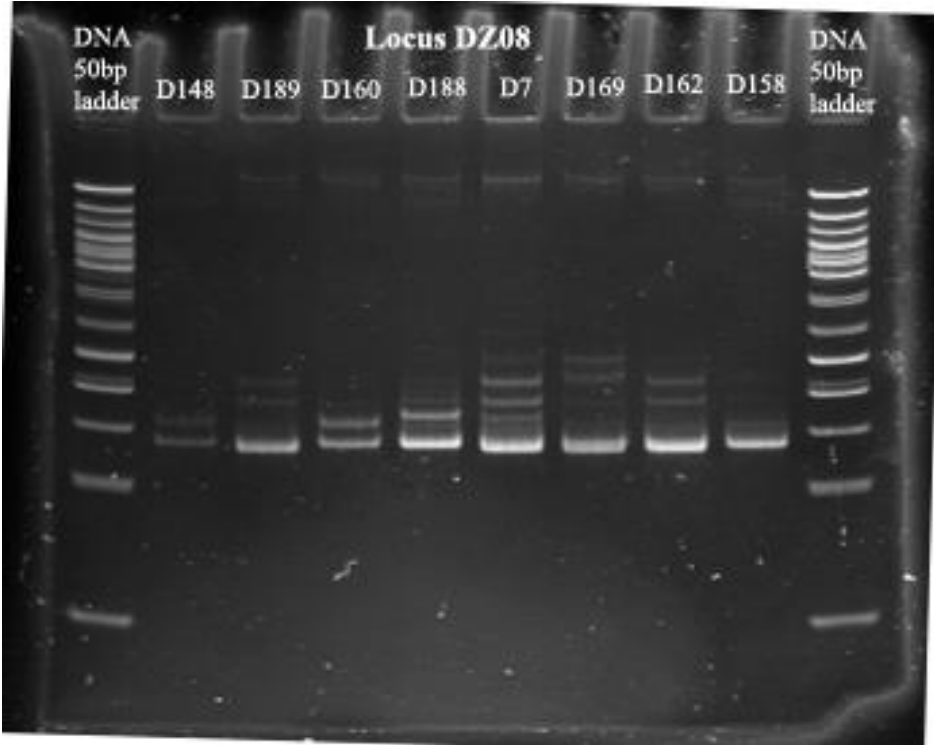

Figure S26 PCR products of eight durian types at locus DZ08 on 8% (w/v) polyacrylamide gel

**Genetic variation and DNA fingerprinting of durian types in Malaysia using simple sequence repeat (SSR) markers**

Siew GY, Ng WL, Tan SW, Alitheen NB, Tan SG, Yeap SK

---

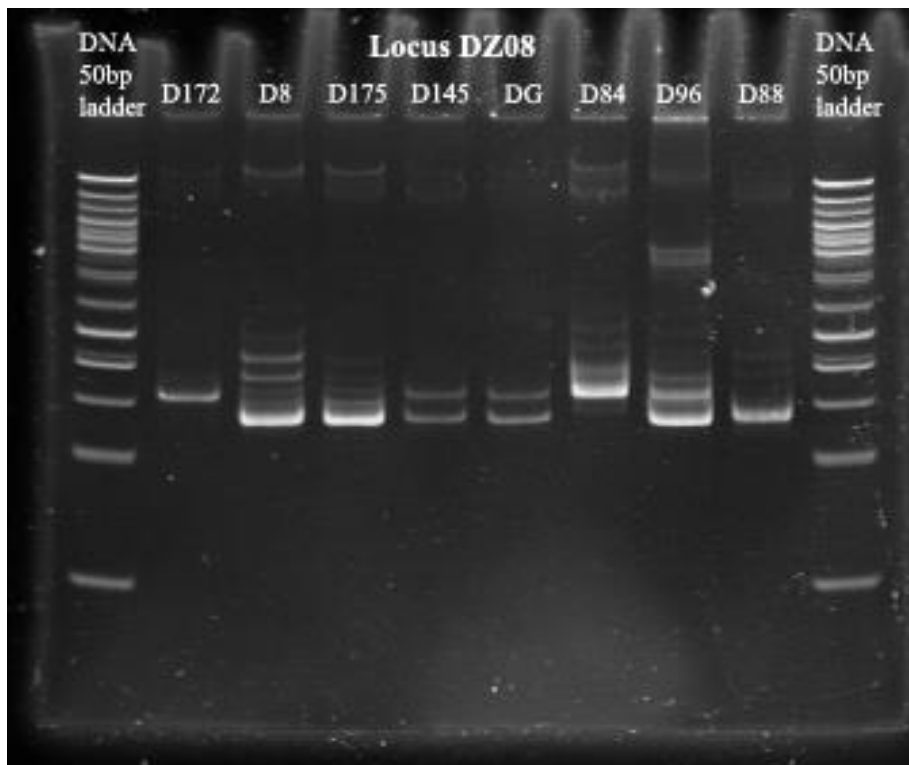

Figure S27 PCR products of eight durian types at locus DZ08 on 8% (w/v) polyacrylamide gel

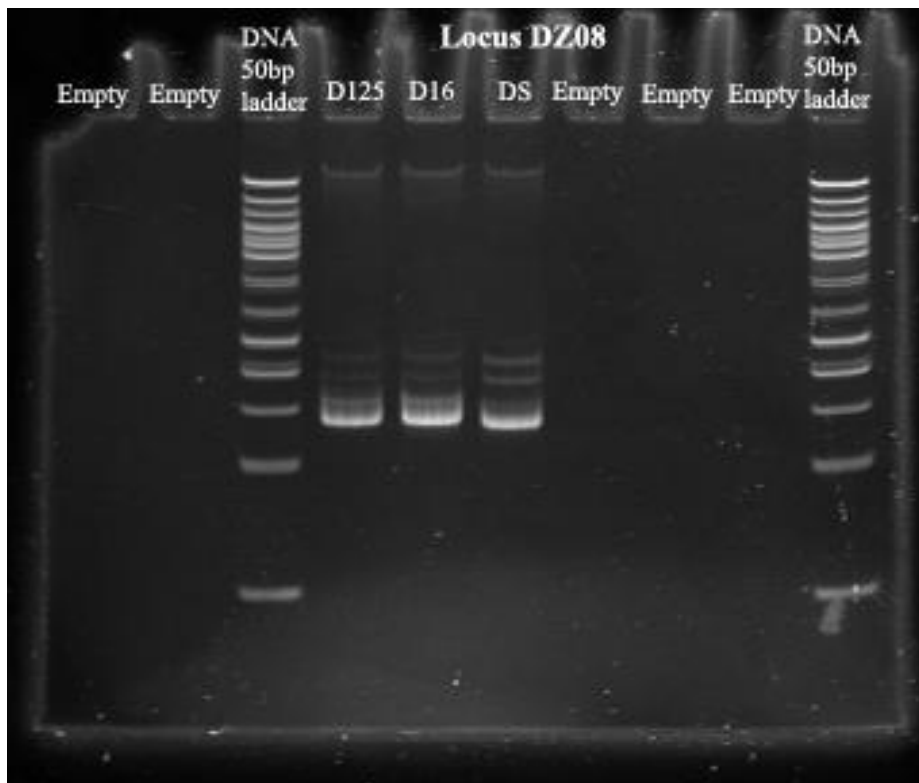

Figure S28 PCR products of three durian types at locus DZ08 on 8% (w/v) polyacrylamide gel
