# Supplementary material for: Genetic variation and DNA fingerprinting of durian types in Malaysia using simple sequence repeat (SSR) markers
Source: PeerJ. 2018 Mar 2;6:e4266. doi: 10.7717/peerj.4266 (PMC5836569; doi:10.7717/peerj.4266)
Supplement: Table S1 [file peerj-06-4266-s001.xlsx]

## Sheet: SSR Genotyping Data
Table S1: Band scoring of 27 durian types at seven SSR loci
Durian type	Locus
	DZ01		DZ02		DZ03		DZ04		DZ05		DZ07		DZ08
D2	260	260	350	350	140	140	200	210	200	200	440	440	140	140
D7	210	260	350	350	150	150	200	226	200	200	440	440	140	140
D8	226	226	350	350	150	150	200	226	200	200	440	440	140	140
D10	260	260	350	350	140	140	200	210	200	200	440	440	140	140
D16	260	260	350	350	140	140	200	200	200	200	440	440	140	140
D24	250	260	320	360	140	140	210	226	200	200	440	440	140	140
D84	260	260	350	376	150	150	226	226	200	200	440	440	160	160
D88	226	260	350	350	126	126	200	226	200	200	440	440	140	140
D96	260	260	350	350	150	150	200	210	200	200	440	440	140	140
D99	260	260	350	350	140	140	226	226	200	200	440	440	140	140
D125	226	260	350	350	140	140	200	226	200	200	440	440	140	140
D145	226	260	350	376	126	126	200	200	200	200	440	440	140	140
D148	226	250	350	360	140	150	200	200	200	200	440	440	140	140
D158	260	260	340	360	126	140	200	226	200	200	440	440	140	140
D159	260	260	376	376	140	140	210	226	200	200	440	440	140	140
D160	250	260	350	376	140	140	200	226	200	200	440	440	140	140
D162	250	250	350	350	140	140	200	200	200	200	440	440	140	140
D168	226	260	350	350	140	140	210	226	200	200	440	440	140	140
D169	226	226	360	360	140	140	200	226	200	200	440	440	140	140
D172	226	250	340	340	126	140	210	226	200	200	440	440	160	160
D175	250	250	340	340	126	140	226	226	200	200	440	440	140	140
D188	210	260	350	350	150	150	200	226	200	200	440	440	140	140
D189	210	260	350	360	150	150	226	226	200	200	440	440	140	140
D190	210	260	350	350	140	140	226	226	200	200	440	440	140	140
D197	226	260	350	350	140	140	210	226	200	200	440	440	140	140
DG	260	260	350	350	126	150	210	226	200	200	440	440	140	140
DS	226	260	350	350	126	140	200	226	200	200	440	440	140	140
